# Supplementary material for: Six months of physical inactivity is insufficient to cause chronic kidney disease in C57BL/6J mice
Source: PubMed Central journal article supplement — bioRxiv. 2024 Aug 30:2024.08.29.610415. Preprint. [Version 1] doi: 10.1101/2024.08.29.610415 (PMC11384017; doi:10.1101/2024.08.29.610415), 2024-08-30
Supplement: NIHPP2024.08.29.610415v1-supplement-1.pdf [file NIHPP2024.08.29.610415v1-supplement-1.pdf]

**Supplemental Table 1:** List of primers and their sequences

|        |                             |                            |
|--------|-----------------------------|----------------------------|
| NGAL   | Fwd-CACTGACTACGACCAGTTTGCC  | Rev-GATGTTGTTATCCTTGAGGCC  |
| Col1a1 | Fwd-CCTCAGGGTATTGCTGGACAAC, | Rev-CAGAAGGACCTTGTTTGCCAGG |
| Col4a1 | Fwd-ATGGCTTGCCTGGAGAGATAGG, | Rev-TGGTTGCCCTTTGAGTCCTGGA |
| KIM-1  | Fwd-CTGGAATGGCACTGTGACATCC  | Rev-GCAGATGCCAACATAGAAGCCC |

## Supplemental Figure 1

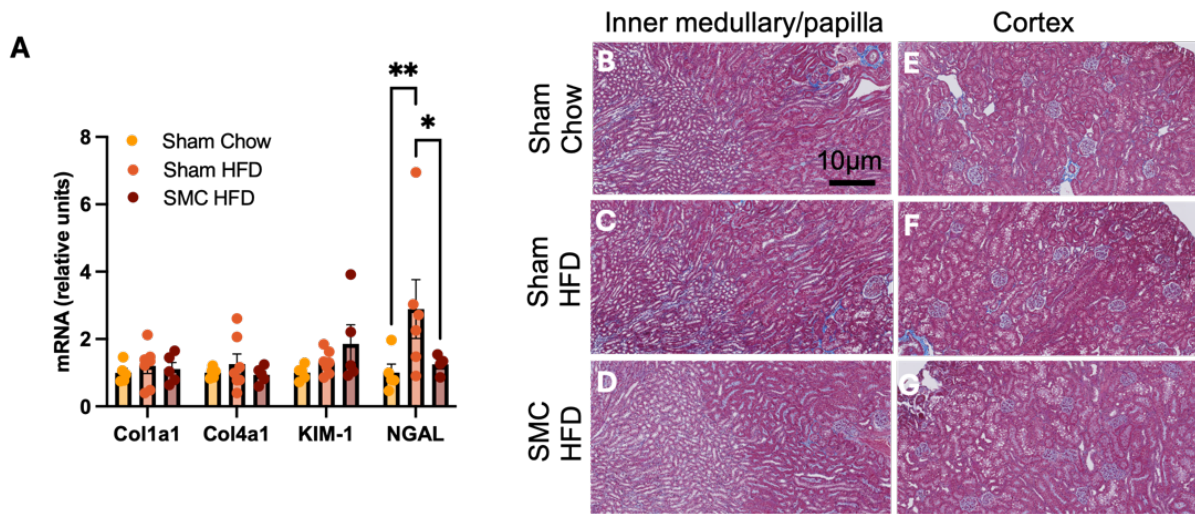

Combined SMC and HFD intervention induces mild kidney fibrosis. (A) Kidney damage markers: collagen I & IV, kidney injury marker-1 (KIM1), and neutrophil gelatinase-associated lipocalin (NGAL) relative expression. Trichrome-stained kidney inner medullary/papilla (B-D) and cortex (E-G) sections from sham and SMC mice fed chow or HFD housed at room temperature. P value =0.05 (P value \* $<0.05$ , \*\*  $<0.005$ , \*\*\*  $<0.0005$ ). Images are representative of n=5-10 per group. Magnification at 20x zoomed using Zeiss AxioScan.Z1 slide scanner. HFD – High-fat Diet; SMC – Small mouse cage; RT – Room temperature.

## Supplemental Figure 2

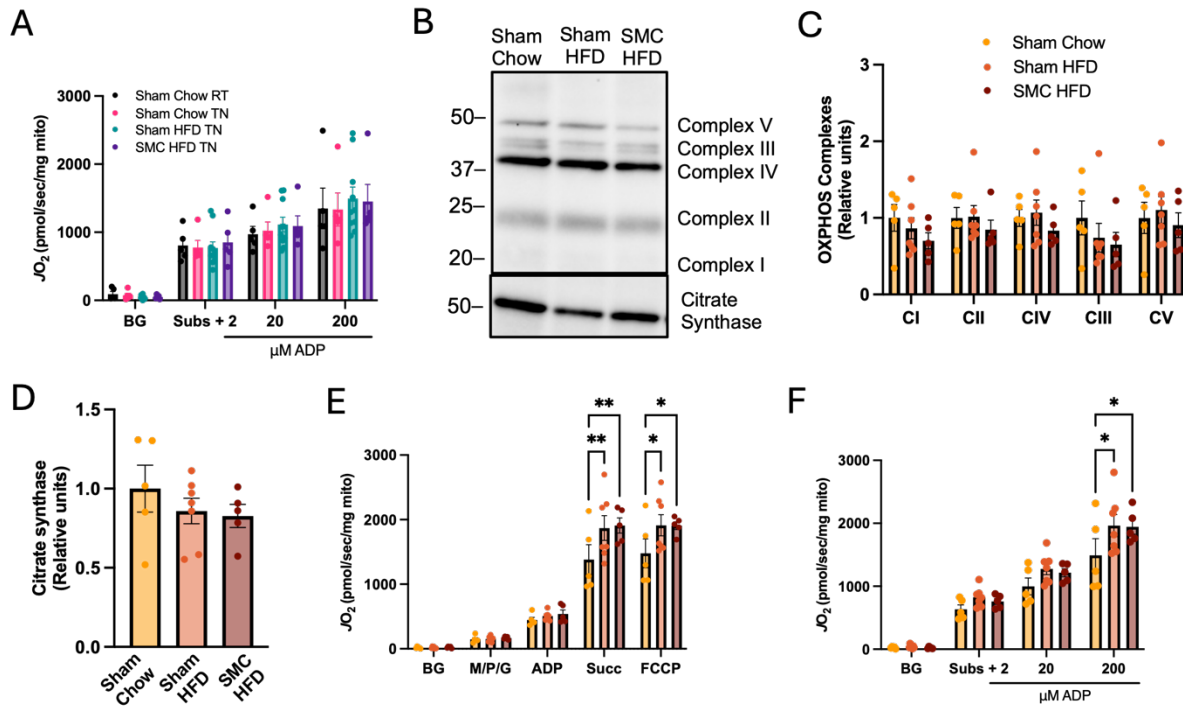

Mitochondrial bioenergetic phenotyping in kidney. (A)  $O_2$  utilization with ADP titrations (TN), (B) Western blots, and (C) quantifications for OXPHOS complexes I - V and (D) citrate synthase in whole kidney lysate. (E)  $O_2$  utilization using enriched kidney mitochondria fraction with glycolytic substrates (2 mM ADP, 0.5 mM malate, 5 mM pyruvate, 10 mM succinate, 1  $\mu$ M carbonyl cyanide-*p*-trifluoromethoxyphenylhydrazone (FCCP) and (F)  $O_2$  utilization with ADP titrations (RT).  $n=5-10$  per group. HFD – High-fat Diet; SMC – Small mouse cage; RT – Room temperature; TN – Thermoneutrality.

### Supplemental Figure 3

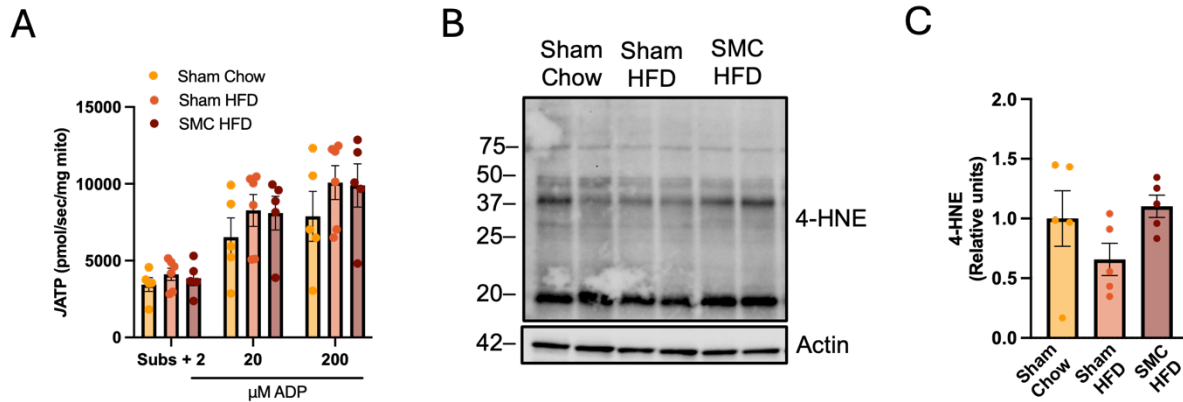

Mitochondrial ATP production and electron leak. (A) ATP production with ADP titrations using enriched kidney mitochondria fraction. (B) Western blots and (C) quantification for 4-hydroxynonenal (4-HNE) and actin in whole kidney lysate of sham and SMC mice at room temperature, n=5-10 per group. HFD – High-fat Diet; SMC – Small mouse cage; RT – Room temperature; ADP- Adenosine 5'-diphosphate.
